# Supplementary material for: Hsp70 Isoforms Are Essential for the Formation of Kaposi’s Sarcoma-Associated Herpesvirus Replication and Transcription Compartments
Source: PubMed Central journal article supplement (PMC4654589; doi:10.1371/journal.ppat.1005274), 2015-11-20
Supplement: ppat.1005274.s001.pdf [file ppat.1005274.s001.pdf]

| <b>Gene</b>                        | <b>Uniprot number</b> | <b>Ratio Reactivated/ Unreactivated</b> | <b>Number of unique peptides</b> |
|------------------------------------|-----------------------|-----------------------------------------|----------------------------------|
| CSNK2A1                            | E7EU96                | 3.091                                   | 14                               |
| CSNK2B                             | P67870                | 2.812                                   | 6                                |
| CSNK2A2                            | P19784                | 2.477                                   | 6                                |
| BLM                                | H0YNU5                | 12.941                                  | 6                                |
| TOP2A (topoisomerase II $\alpha$ ) | P11388                | 2.399                                   | 52                               |
| DDX5                               | B4DLW8                | 2.622                                   | 47                               |
| DDX17                              | Q92841                | 2.172                                   | 54                               |
| RPL11                              | Q08ES8                | 2.471                                   | 16                               |
| HIST1H1C                           | P16403                | 2.271                                   | 31                               |
| HNRNPA0                            | Q13151                | 2.393                                   | 9                                |
| HNRNPH1                            | E9PCY7                | 1.964                                   | 9                                |
| HNRNPF                             | P52597                | 1.852                                   | 3                                |
| RBBP7                              | Q5JNZ9                | 1.805                                   | 2                                |
| TOP1 (topoisomerase I)             | P11387                | 1.856                                   | 10                               |
| HDAC2                              | B3KRS5                | 1.853                                   | 7                                |
| PCNA                               | P12004                | 1.633                                   | 3                                |
| DDX21                              | Q9NR30                | 1.615                                   | 76                               |
| RCOR1                              | Q9UKL0                | 1.662                                   | 5                                |
| EIF6                               | P56537                | 1.515                                   | 18                               |
| HNRNPA1                            | F8VXY0                | 1.620                                   | 30                               |
| HNRNPA2B1                          | P22626                | 1.489                                   | 49                               |
| HNRNPM                             | P52272                | 1.427                                   | 101                              |
